# Supplementary material for: Rapid Visual Detection of African Swine Fever Virus with a CRISPR/Cas12a Lateral Flow Strip Based on Structural Protein Gene D117L
Source: MDPI journal article supplement (doi:10.3390/ani13233712), 2023-11-30
Supplement: s1 [file s1]

Table S1. Primers used in this study

| Primer names        | Primer sequences (5' - 3')                                             |
|---------------------|------------------------------------------------------------------------|
| pET28a-Cas12a-F     | GTGCCGCGCGGCAGCCATATGATGAGCAAGCTGGAGAAGTTT                             |
| pET28a-Cas12a-R     | GTGGTGGTGGTGCTCGAGTTAGTGCTTCACGCTGGTCTGGGC                             |
| T1-F                | GCTTGTGGCCGTTTACGTCGCCGTCCAGCTCGACCAGGATGGGCACCAACCCCGGC               |
| T1-R                | GCCGGGGTGGTGCCCATCCTGGTCGAGCTGGACGGCGACGTAAACGGCCACAAGC                |
| T1-crRNA1-F         | GAAATTAATACGACTCACTATAGGGTAATTTCTACTAAGTGTAGATCGTCGCCGTCCAGCT<br>CGACC |
| T1-crRNA1-R         | GGTCGAGCTGGACGGCGACGATCTACACTTAGTAGAAATTACCCTATAGTGAGTCGTATT<br>AATTTC |
| D117L-crRNA1-F      | GAAATTAATACGACTCACTATAGGAATTTCTACTAAGTGTAGATGGTATGCTCGACTTGCA<br>GTC   |
| D117L-crRNA1-R      | GACTGCAAGTCGAGCATACCATCTACACTTAGTAGAAATTCCTATAGTGTCGTCGTATTAA<br>TTTC  |
| D117L-crRNA2-F      | GAAATTAATACGACTCACTATAGGAATTTCTACTAAGTGTAGATTCATAACCTGTCAACCC<br>GCG   |
| D117L-crRNA2-R      | CGCGGGTTGACAGGTTATGAATCTACACTTAGTAGAAATTCCTATAGTGAGTCGTATTAAT<br>TTC   |
| Non-target crRNA1-F | GAAATTAATACGACTCACTATAGGAATTTCTACTAAGTGTAGTCATAACCTGTCAACCCGC<br>G     |
| Non-target crRNA1-R | AGTATTGGACAGTTGGGCGCCTACACTTAGTAGAAATTCCTATAGTGTCGTCGTATTAATT<br>TC    |

---

|              |                                                  |
|--------------|--------------------------------------------------|
| RPA-D117L-F1 | TTAGCCCATACAATCGCCAAATATCCCGGAACAA               |
| RPA-D117L-R1 | TTCTAAAGAATACCGGGAAATGGTGGTGAGGCTC               |
| RPA-D117L-F2 | ACAACTGCGATTCTCCTGGGCATTTTGATTTT                 |
| RPA-D117L-R2 | GTGGTGAGGCTCAGGTTGTTGTACATAGTAGC                 |
| RPA-D117L-F3 | ACAACTGCGATTCTCCTGGGCATTTTGATTTTGC               |
| RPA-D117L-R3 | GTGGTGAGGCTCAGGTTGTTGTACATAGTAGCTA               |
| RPA-D117L-F4 | ATCCCGGAACAACCTGCGATTCTCCTGGGCATTT               |
| RPA-D117L-R4 | GCTCAGGTTGTTGTACATAGTAGCTAGGAGGA                 |
| RPA-D117L-F5 | ATCCCGGAACAACCTGCGATTCTCCTGGGCATT                |
| RPA-D117L-R5 | TTCTAAAGAATACCGGGAAATGGTGGTGAGGC                 |
| PRRSV-UF     | GCCCCTGCCAYCACG                                  |
| PRRSV-UR     | TCGCCCTAATTGAATAGGTGA                            |
| PEDV-N-F1    | GGGCCGTCGACATGGCTTCTGTCAGTTTTTCAGGATCG           |
| PEDV-N-F1    | GGGCCGATATTCATTTCCTGTATCGAAGATCTCGTTGATAATTTCAAC |
| PKV-R1       | GCATGAGTCTATTCTACACAGAGC                         |
| PKV-F1       | TGTATTGGCAACGAGACGTATG                           |
| PPV4-F1      | CTTTGCTTTGTCCAACGCAGA                            |
| PPV4-R1      | TAGATGTCCTGGCACAGATACTTGAC                       |
| PRV-gC-F1    | CGAGACCGAGGGCGTCTACAC                            |
| PRV-gC-R1    | GCCCATCATCAGCGCCTGC                              |
| CSFV-UF      | CTGGGTGGTCTAAGTCCTGAGTA                          |

---

---

|            |                                          |
|------------|------------------------------------------|
| CSFV-UR    | GATTCAACTCCATGTGCCATGTA                  |
| PCV2-F1    | CACATCGAGAAAGCGAAAGGAAC                  |
| PCV2-R1    | TGCGGGCCAAAAAAGGTACAGTT                  |
| PCV3-F1    | CTGTTATTTTGGATGATTTTATG                  |
| PCV3-R1    | CACAGCCGTTACTTCACCC                      |
| SIV-HA-F1  | AAACCAATGATAGGGCCAA                      |
| SIV-HA-R1  | TTGCACTACACAGTTACCAC                     |
| p72-UF     | TGCTCATGGTATCAATCTTATCG                  |
| p72-UR     | CCACTGGGTTGGTATTCCTC                     |
| p72-TaqMan | 5' FAM-TTCCATCAAAGTTCTGCAGCTCTT-TAMRA 3' |

---
